# Supplementary material for: RENET2: high-performance full-text gene–disease relation extraction with iterative training data expansion
Source: PubMed Central journal article supplement (PMC8256824; doi:10.1093/nargab/lqab062), 2021-07-05
Supplement: lqab062_supplemental_file.pdf [file lqab062_supplemental_file.pdf]

# Supplementary Materials for

## RENET2: Accurate Full-text Gene-Disease Relation Extraction with Efficient Iterative Data Expansion

### Supplementary Tables

Table S1. Statistics of (a) the abstract datasets (b) the full-text datasets.

(a)

| Dataset            | Documents | Annotated label |            |           |                |
|--------------------|-----------|-----------------|------------|-----------|----------------|
|                    |           | Total #         | Associated | Ambiguous | Non-associated |
| Abstract           | 500       | 2,813           | 870        | 92        | 1,851          |
| Abstract expansion | 500       | 624             | 319        | 47        | 258            |
| Total              | 1000      | 3,437           | 1,189      | 139       | 2,109          |

(b)

| Dataset   | Documents | Iteration | Annotated label |            |           |                |
|-----------|-----------|-----------|-----------------|------------|-----------|----------------|
|           |           |           | Total #         | Associated | Ambiguous | Non-associated |
| Full-text | 500       | 1st       | 793             | 473        | 13        | 307            |
|           |           | 2nd       | 763             | 421        | 3         | 339            |
|           |           | Total     | 1,556           | 894        | 16        | 646            |

Table S2. Comparison of RENET2 for relation extraction from abstracts.

| Model  | Using ambiguous associations | Precision     | Recall        | F1 score      |
|--------|------------------------------|---------------|---------------|---------------|
| RENET  | No                           | 0.6677        | 0.7092        | 0.6878        |
| RENET2 | No                           | 0.7117        | 0.6724        | 0.6915        |
|        | Yes                          | <b>0.7127</b> | <b>0.7184</b> | <b>0.7155</b> |

The best result of each column is in bold.

Table S3. Data and computational resource consumption statistics of RE from 1,889,558 PMC open-access full-text articles.

| Data                |           |
|---------------------|-----------|
| Number of Full-text | 1,889,558 |

|                                           |             |
|-------------------------------------------|-------------|
| Number of Found GDAs                      | 3,717,569   |
| Raw Data Size                             | 15.4 GB     |
| <b>Computational resource consumption</b> |             |
| Total wall-clock                          | 14.65 hours |
| Total GPU hours                           | 718 hours   |
| GPU Cards (NVIDIA GeForce GTX 1080 Ti)    | 49          |

## Supplementary notes

### The RENET2 network architecture

RENET2 in sequence uses an embedding layer, a convolutional neural network (CNN), a recurrent neural network (RNN), and a fully connected network (FCN) to compute the probability of GDA.

RENET2 uses embedding layers to map token IDs to a vector of features, which consists of two parts: 1) word embedding for each token's context meaning, and 2) role embedding to indicate a token's role in the sentence, including target gene, target disease, non-target gene, and non-target disease. Word embedding and role embedding are concatenated together as the word representation input for the next layer. The input size settings of RENET2 are as follows:

|                         | Abstract | Full-text                |
|-------------------------|----------|--------------------------|
| Max sentence            | 32       | 1000 (basic), 400 (SeFi) |
| Max tokens per sentence | 54       | 54                       |

RENET2 uses CNN to obtain the sentence feature, BiLSTM to obtain the document feature, and three-layer FCNs, followed by a sigmoid activation, to compute the probability of each GDA. The network architecture layer settings are as follows:

| Layers                   | Size               |
|--------------------------|--------------------|
| Token ID embedding       | 64                 |
| Token role embedding     | 4                  |
| CNN kernel size (Conv1D) | [2, 3, 4, 5] X 100 |
| RNN hidden size (BiLSTM) | 69 X 2             |
| FCN1                     | 136 X 136          |
| FCN2                     | 136 X 136          |
| FCN3                     | 136 X 1            |

The hyperparameters used in RENET2 for different types of inputs are as follows:

| Hyperparameters | Abstract | Full-text |
|-----------------|----------|-----------|
| Learning rate   | 1e-3     | 8e-4      |
| L2 penalty term | 1e-4     | 5e-5      |

|                                        |     |     |
|----------------------------------------|-----|-----|
| Training epochs                        | 18  | 10  |
| Dropout rate, after token ID embedding | 0.3 | 0.3 |
| Dropout rate, after FCN2               | 0.1 | 0.1 |
